# Supplementary material for: Effects of functional groups in iron porphyrin on the mechanism and activity of oxygen reduction reaction
Source: Royal Society of Chemistry journal article supplement (doi:10.1039/d2ra08007a), 2023-01-01
Supplement: d2ra08007a1.pdf [file d2ra08007a1.pdf]

Electronic Supplementary Information

## Effects of functional groups in iron porphyrin on the mechanism and activity of oxygen reduction reaction

Tran Phuong Dung<sup>a,b</sup>, Viorel Chihaiac, Do Ngoc Son<sup>d,e,†</sup>

<sup>a</sup>Department of Chemistry, University of Science, Vietnam National University, Ho Chi Minh City, Vietnam

<sup>b</sup>Department of Chemistry, Ho Chi Minh City University of Education, Ho Chi Minh City, Vietnam

<sup>c</sup>Institute of Physical Chemistry "Ilie Murgulescu" of the Romanian Academy, Splaiul Independentei 202, Sector 6, 060021 Bucharest, Romania

<sup>d</sup>Ho Chi Minh City University of Technology (HCMUT), 268 Ly Thuong Kiet Street, District 10, Ho Chi Minh City, Vietnam

<sup>e</sup>Vietnam National University Ho Chi Minh City, Linh Trung Ward, Ho Chi Minh City, Vietnam

†Correspondence: [dson@hcmut.edu.vn](mailto:dson@hcmut.edu.vn)

**Table S1** The bond distance (Å) between the oxygen atoms ( $d_{O-O}$ ), and from the nearest oxygen atom of the intermediates to the iron atom of the substrate ( $d_{O-Fe}$ ), in the most stable adsorption configuration of the intermediates on FePor, FeTMP, FeTAP, and FeTCP.

| Intermediates   | $d_{O-Fe} / \text{Å}$ |       |       |       | $d_{O-O} / \text{Å}$ |       |       |       |
|-----------------|-----------------------|-------|-------|-------|----------------------|-------|-------|-------|
|                 | FePor                 | FeTMP | FeTAP | FeTCP | FePor                | FeTMP | FeTAP | FeTCP |
| $O_2^*$         | 1.807                 | 1.807 | 1.815 | 1.819 | 1.303                | 1.306 | 1.313 | 1.299 |
| $HOO^*$         | 1.768                 | 1.764 | 1.772 | 1.767 | 1.523                | 1.536 | 1.556 | 1.519 |
| $HOOH^*$        | 1.844                 | 1.874 | 1.862 | 1.878 | 2.160                | 2.231 | 2.281 | 2.169 |
| $O^* + H_2O^*$  | 1.661                 | 1.666 | 1.679 | 1.661 | 2.811                | 2.827 | 2.848 | 2.856 |
| $HO^* + H_2O^*$ | 1.823                 | 1.829 | 1.864 | 1.818 | 2.820                | 2.798 | 2.785 | 2.896 |
| $2 H_2O^*$      | 2.458                 | 2.526 | 2.597 | 2.321 | 2.912                | 2.949 | 3.046 | 3.097 |
| $O^* + O^*$     | 1.656                 | 1.660 | 1.669 | 1.639 | 4.634                | 4.672 | 4.639 | 4.621 |
| $O^* + HO^*$    | 1.817                 | 1.822 | 1.842 | 1.811 | 4.742                | 4.825 | 4.694 | 4.678 |
| $HO^* + HO^*$   | 1.817                 | 1.824 | 1.870 | 1.813 | 5.116                | 5.087 | 5.143 | 5.221 |

**Table S2** Bader point charge ( $e^-$ ) of each oxygen atom of the intermediates on the substrates. The oxygen atoms: (O1) nearest to the Fe site and (O2) on another site.

| Order number | Intermediates   | FePor |       | FeTMP |       | FeTAP |       | FeTCP |       |
|--------------|-----------------|-------|-------|-------|-------|-------|-------|-------|-------|
|              |                 | O1    | O2    | O1    | O2    | O1    | O2    | O1    | O2    |
| 1            | $O_2^*$         | 0.282 | 0.157 | 0.325 | 0.141 | 0.331 | 0.173 | 0.250 | 0.143 |
| 2            | $HOO^*$         | 0.440 | 1.029 | 0.448 | 1.049 | 0.488 | 1.070 | 0.455 | 1.018 |
| 3            | $HOOH^*$        | 1.303 | 1.214 | 1.394 | 1.272 | 1.307 | 1.383 | 1.374 | 1.239 |
| 4            | $O^* + H_2O^*$  | 0.717 | 2.018 | 0.714 | 2.020 | 0.714 | 2.026 | 0.707 | 2.015 |
| 5            | $HO^* + H_2O^*$ | 1.482 | 2.023 | 1.507 | 2.025 | 1.530 | 2.035 | 1.482 | 2.019 |
| 6            | $2 H_2O^*$      | 1.965 | 2.021 | 1.974 | 2.017 | 1.986 | 2.012 | 1.952 | 2.012 |
| 7            | $O^* + O^*$     | 0.716 | 0.882 | 0.645 | 0.861 | 0.729 | 0.831 | 0.687 | 0.859 |
| 8            | $O^* + HO^*$    | 1.441 | 0.871 | 1.441 | 0.863 | 1.465 | 0.853 | 1.428 | 0.847 |
| 9            | $HO^* + HO^*$   | 1.450 | 1.694 | 1.451 | 1.669 | 1.496 | 1.642 | 1.438 | 1.678 |

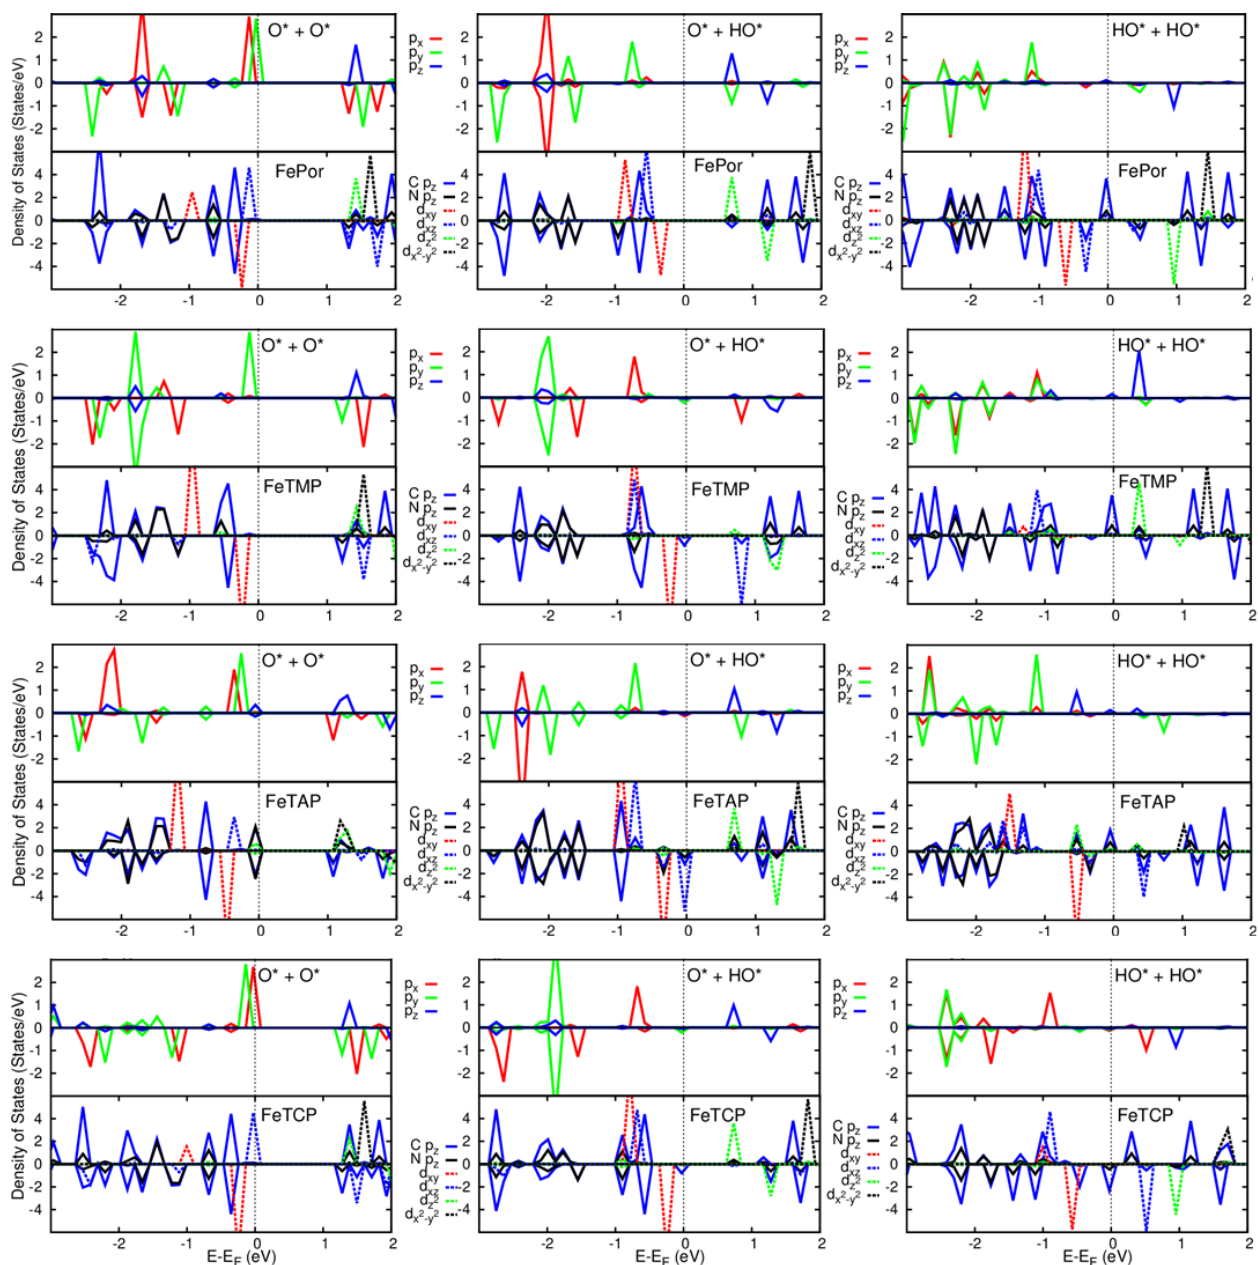

**Fig. S1** Electronic density of states for the systems of the substrates with  $O^* + O^*$ ,  $O^* + HO^*$ , and  $HO^* + HO^*$ . The  $d_{xz}$  and  $d_{yz}$  orbitals are identical.

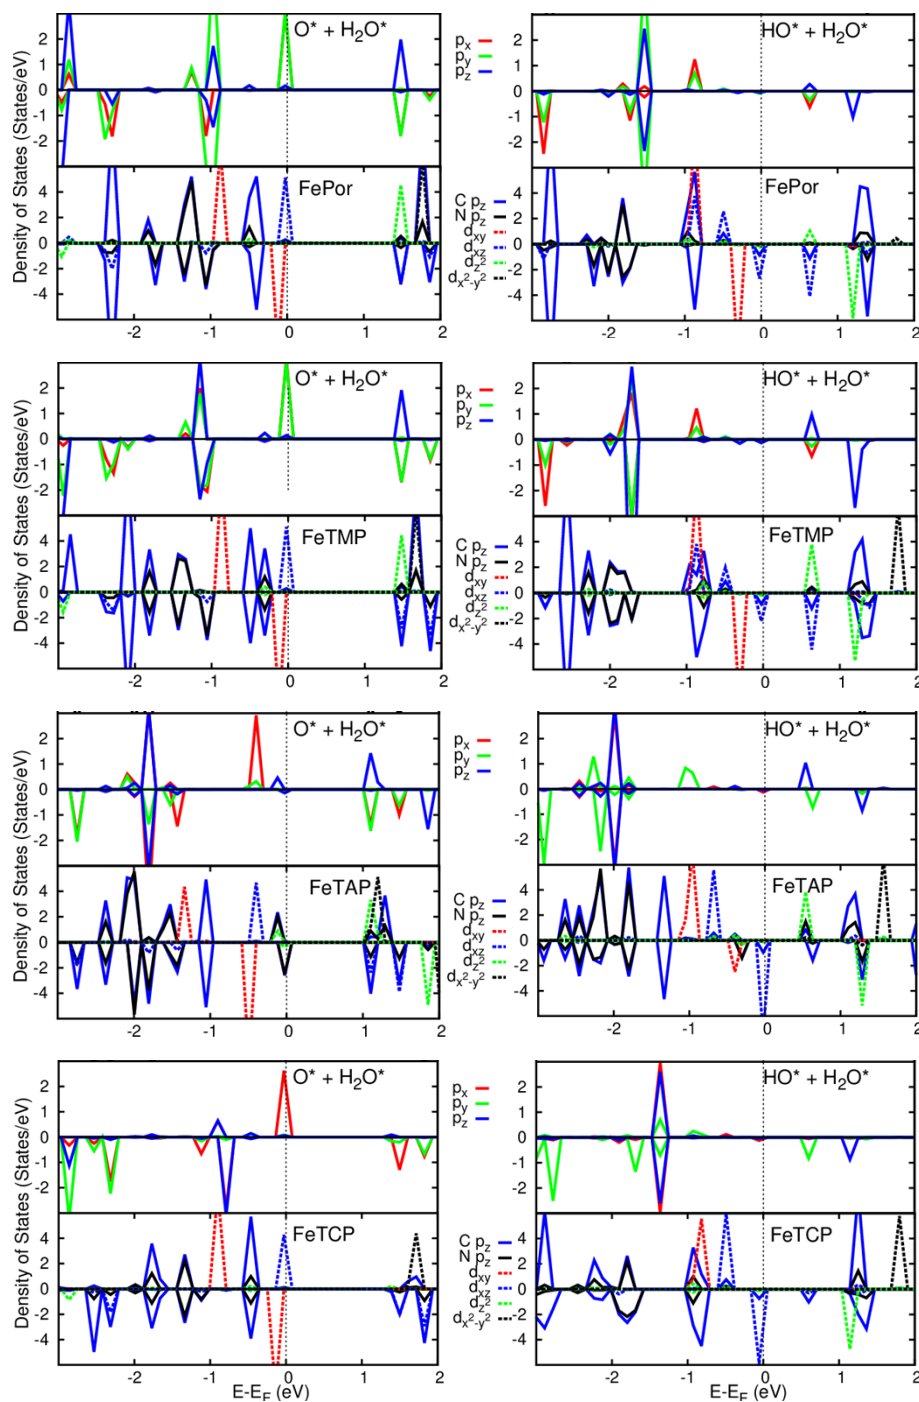

**Fig. S2** Electronic density of states for the systems of the substrates with  $O^* + H_2O^*$  and  $HO^* + H_2O^*$ . The  $d_{xz}$  and  $d_{yz}$  orbitals are identical.
